# Supplementary material for: Interference of potassium chloride and diammonium hydrogen phosphate on volumetric, viscometric and spectroscopic properties of aqueous nicotinamide
Source: Royal Society of Chemistry journal article supplement (doi:10.1039/d4ra06869f), 2025-01-01
Supplement: d4ra06869f1.pdf [file d4ra06869f1.pdf]

## Interference of potassium chloride and diammonium hydrogen phosphate on volumetric, viscometric and spectroscopic properties of aqueous nicotinamide

Prachiprava Mohapatra, Siddhartha Panda, Dwitikrishna Mishra, Sulochana Singh\*,  
Malabika Talukdar\*

Department of Chemistry, Siksha O Anusandhan Deemed to be University, Bhubaneswar-  
751030, Odisha, India

Corresponding authors' email id: [sulochanasingh@soa.ac.in](mailto:sulochanasingh@soa.ac.in); [malabikatalukdar@soa.ac.in](mailto:malabikatalukdar@soa.ac.in)

### Supplementary file

Table 1 Temperature-dependent densities ( $\rho$ ) and dynamic viscosity ( $\eta$ ) of NA in water,  
(water + KCl) and (water + DAP) at different temperatures and experimental pressure at P  
=101 kPa.

| $m_A/\text{mol}$ | $\rho/\text{kg m}^{-3}$ |         |         |         |         | $\eta/(\text{Pa s})$ |         |         |         |         |
|------------------|-------------------------|---------|---------|---------|---------|----------------------|---------|---------|---------|---------|
| $\text{kg}^{-1}$ | 293.15K                 | 298.15K | 303.15K | 308.15K | 313.15K | 293.15K              | 298.15K | 303.15K | 308.15K | 313.15K |
| NA + $H_2O$      |                         |         |         |         |         |                      |         |         |         |         |
| 0.009            | 998.5                   | 997.4   | 996.0   | 994.3   | 992.5   | 1.00                 | 0.89    | 0.80    | 0.72    | 0.65    |
| 0.029            | 999.1                   | 997.9   | 996.5   | 994.9   | 993.0   | 1.01                 | 0.91    | 0.81    | 0.73    | 0.66    |
| 0.051            | 999.7                   | 998.5   | 997.0   | 995.4   | 993.5   | 1.02                 | 0.92    | 0.83    | 0.75    | 0.67    |
| 0.069            | 1000.3                  | 999.1   | 997.6   | 996.0   | 994.1   | 1.03                 | 0.93    | 0.84    | 0.76    | 0.69    |
| 0.089            | 1000.9                  | 999.7   | 998.2   | 996.5   | 994.6   | 1.04                 | 0.95    | 0.85    | 0.76    | 0.69    |
| 0.111            | 1001.6                  | 1000.3  | 998.8   | 997.1   | 995.2   | 1.05                 | 0.96    | 0.86    | 0.78    | 0.70    |
| 0.129            | 1002.4                  | 1000.9  | 999.4   | 997.7   | 995.8   | 1.06                 | 0.97    | 0.87    | 0.79    | 0.71    |
| 0.149            | 1003.1                  | 1001.6  | 1000.0  | 998.3   | 996.4   | 1.07                 | 0.99    | 0.89    | 0.80    | 0.72    |
| NA + 0.501 m KCl |                         |         |         |         |         |                      |         |         |         |         |
| 0.000            | 1022.3                  | 1020.2  | 1018.7  | 1017.1  | 1015.2  | 0.98                 | 0.88    | 0.80    | 0.72    | 0.66    |

|                  |        |        |        |        |        |      |      |      |      |      |
|------------------|--------|--------|--------|--------|--------|------|------|------|------|------|
| 0.009            | 1022.4 | 1020.2 | 1018.8 | 1017.2 | 1015.3 | 1.01 | 0.90 | 0.82 | 0.74 | 0.68 |
| 0.029            | 1022.8 | 1020.5 | 1019.0 | 1017.4 | 1015.5 | 1.03 | 0.92 | 0.84 | 0.76 | 0.70 |
| 0.049            | 1023.1 | 1020.8 | 1019.3 | 1017.6 | 1015.7 | 1.04 | 0.94 | 0.86 | 0.78 | 0.72 |
| 0.069            | 1023.5 | 1021.1 | 1019.6 | 1017.9 | 1016.0 | 1.06 | 0.95 | 0.88 | 0.79 | 0.73 |
| 0.089            | 1023.9 | 1021.4 | 1019.9 | 1018.2 | 1016.2 | 1.08 | 0.97 | 0.89 | 0.81 | 0.74 |
| 0.109            | 1024.4 | 1021.8 | 1020.3 | 1018.6 | 1016.6 | 1.09 | 0.98 | 0.90 | 0.82 | 0.76 |
| 0.129            | 1024.9 | 1022.2 | 1020.7 | 1019.0 | 1016.9 | 1.10 | 1.00 | 0.91 | 0.83 | 0.77 |
| 0.151            | 1025.4 | 1022.7 | 1021.1 | 1019.4 | 1017.3 | 1.11 | 1.01 | 0.93 | 0.85 | 0.78 |
| NA + 0.749 m KCl |        |        |        |        |        |      |      |      |      |      |
| 0.000            | 1032.2 | 1030.7 | 1029.4 | 1027.5 | 1025.9 | 0.98 | 0.88 | 0.80 | 0.72 | 0.66 |
| 0.009            | 1032.3 | 1030.8 | 1029.5 | 1027.6 | 1025.9 | 1.01 | 0.91 | 0.83 | 0.75 | 0.69 |
| 0.029            | 1032.5 | 1031.0 | 1029.6 | 1027.7 | 1026.1 | 1.03 | 0.94 | 0.85 | 0.77 | 0.71 |
| 0.049            | 1032.8 | 1031.2 | 1029.9 | 1027.9 | 1026.3 | 1.05 | 0.96 | 0.88 | 0.79 | 0.73 |
| 0.069            | 1033.1 | 1031.5 | 1030.1 | 1028.1 | 1026.5 | 1.07 | 0.97 | 0.90 | 0.81 | 0.75 |
| 0.089            | 1033.4 | 1031.8 | 1030.3 | 1028.4 | 1026.7 | 1.09 | 0.99 | 0.92 | 0.83 | 0.77 |
| 0.109            | 1033.8 | 1032.1 | 1030.6 | 1028.7 | 1026.9 | 1.11 | 1.01 | 0.93 | 0.85 | 0.78 |
| 0.129            | 1034.2 | 1032.5 | 1031.0 | 1029.1 | 1027.2 | 1.12 | 1.02 | 0.95 | 0.86 | 0.80 |
| 0.151            | 1034.6 | 1032.9 | 1031.3 | 1029.4 | 1027.5 | 1.14 | 1.04 | 0.96 | 0.88 | 0.81 |
| NA + 1.001 m KCl |        |        |        |        |        |      |      |      |      |      |
| 0.000            | 1043.5 | 1042.0 | 1040.6 | 1038.4 | 1036.3 | 0.98 | 0.88 | 0.80 | 0.72 | 0.66 |
| 0.009            | 1043.6 | 1042.1 | 1040.7 | 1038.4 | 1036.3 | 1.01 | 0.91 | 0.83 | 0.75 | 0.69 |
| 0.031            | 1043.7 | 1042.2 | 1040.8 | 1038.6 | 1036.5 | 1.04 | 0.93 | 0.85 | 0.77 | 0.72 |
| 0.049            | 1044.0 | 1042.4 | 1041.0 | 1038.8 | 1036.7 | 1.06 | 0.96 | 0.87 | 0.79 | 0.74 |
| 0.071            | 1044.3 | 1042.7 | 1041.2 | 1039.0 | 1036.9 | 1.08 | 0.98 | 0.89 | 0.81 | 0.76 |
| 0.089            | 1044.6 | 1042.9 | 1041.4 | 1039.2 | 1037.1 | 1.10 | 1.00 | 0.91 | 0.83 | 0.79 |
| 0.109            | 1044.9 | 1043.2 | 1041.6 | 1039.4 | 1037.3 | 1.12 | 1.02 | 0.93 | 0.85 | 0.81 |
| 0.129            | 1045.2 | 1043.5 | 1041.9 | 1039.7 | 1037.5 | 1.14 | 1.04 | 0.95 | 0.87 | 0.82 |
| 0.149            | 1045.7 | 1043.9 | 1042.3 | 1039.9 | 1037.7 | 1.16 | 1.06 | 0.97 | 0.88 | 0.83 |

---

NA + 0.499m DAP

|       |        |        |        |        |        |      |      |      |      |      |
|-------|--------|--------|--------|--------|--------|------|------|------|------|------|
| 0.000 | 1036.9 | 1035.1 | 1033.4 | 1031.2 | 1029.1 | 1.11 | 0.99 | 0.87 | 0.77 | 0.70 |
| 0.009 | 1037.1 | 1035.2 | 1033.6 | 1031.3 | 1029.2 | 1.13 | 1.01 | 0.89 | 0.79 | 0.72 |
| 0.029 | 1037.4 | 1035.5 | 1033.8 | 1031.4 | 1029.3 | 1.15 | 1.03 | 0.91 | 0.81 | 0.74 |
| 0.049 | 1037.7 | 1035.7 | 1033.9 | 1031.5 | 1029.4 | 1.16 | 1.05 | 0.93 | 0.83 | 0.75 |
| 0.069 | 1037.9 | 1035.8 | 1034.1 | 1031.7 | 1029.5 | 1.18 | 1.06 | 0.95 | 0.84 | 0.77 |
| 0.089 | 1038.1 | 1036.0 | 1034.2 | 1031.7 | 1029.5 | 1.20 | 1.08 | 0.96 | 0.86 | 0.78 |
| 0.109 | 1038.2 | 1036.1 | 1034.4 | 1031.8 | 1029.6 | 1.21 | 1.09 | 0.98 | 0.87 | 0.80 |
| 0.131 | 1038.4 | 1036.2 | 1034.5 | 1031.9 | 1029.6 | 1.23 | 1.11 | 0.99 | 0.89 | 0.81 |
| 0.149 | 1038.6 | 1036.4 | 1034.6 | 1032.0 | 1029.6 | 1.25 | 1.13 | 1.01 | 0.90 | 0.82 |

NA + 0.749m DAP

|       |        |        |        |        |        |      |      |      |      |      |
|-------|--------|--------|--------|--------|--------|------|------|------|------|------|
| 0.000 | 1053.5 | 1052.0 | 1050.6 | 1048.6 | 1046.9 | 1.14 | 1.03 | 0.89 | 0.78 | 0.71 |
| 0.009 | 1053.6 | 1052.1 | 1050.7 | 1048.7 | 1047.0 | 1.15 | 1.04 | 0.91 | 0.80 | 0.73 |
| 0.029 | 1053.8 | 1052.3 | 1050.9 | 1048.9 | 1047.1 | 1.17 | 1.06 | 0.93 | 0.82 | 0.75 |
| 0.051 | 1054.0 | 1052.5 | 1051.0 | 1049.0 | 1047.2 | 1.19 | 1.08 | 0.95 | 0.84 | 0.76 |
| 0.069 | 1054.2 | 1052.6 | 1051.2 | 1049.2 | 1047.3 | 1.20 | 1.10 | 0.96 | 0.85 | 0.78 |
| 0.089 | 1054.4 | 1052.8 | 1051.3 | 1049.3 | 1047.5 | 1.22 | 1.12 | 0.98 | 0.87 | 0.79 |
| 0.111 | 1054.5 | 1053.0 | 1051.5 | 1049.4 | 1047.6 | 1.23 | 1.13 | 0.99 | 0.88 | 0.80 |
| 0.129 | 1054.7 | 1053.1 | 1051.6 | 1049.5 | 1047.7 | 1.25 | 1.15 | 1.01 | 0.89 | 0.81 |
| 0.149 | 1054.9 | 1053.3 | 1051.7 | 1049.6 | 1047.8 | 1.27 | 1.16 | 1.03 | 0.91 | 0.83 |

NA + 1.001 m DAP

|       |        |        |        |        |        |      |      |      |      |      |
|-------|--------|--------|--------|--------|--------|------|------|------|------|------|
| 0.000 | 1070.3 | 1068.3 | 1066.9 | 1064.8 | 1062.9 | 1.16 | 1.04 | 0.91 | 0.80 | 0.72 |
| 0.009 | 1070.4 | 1068.4 | 1067.0 | 1064.9 | 1063.0 | 1.18 | 1.05 | 0.93 | 0.81 | 0.74 |
| 0.029 | 1070.6 | 1068.5 | 1067.1 | 1065.0 | 1063.1 | 1.19 | 1.08 | 0.95 | 0.83 | 0.76 |
| 0.049 | 1070.7 | 1068.7 | 1067.2 | 1065.1 | 1063.2 | 1.21 | 1.09 | 0.96 | 0.85 | 0.77 |
| 0.069 | 1070.8 | 1068.8 | 1067.3 | 1065.2 | 1063.2 | 1.23 | 1.11 | 0.98 | 0.86 | 0.78 |
| 0.089 | 1071.0 | 1068.9 | 1067.4 | 1065.3 | 1063.3 | 1.25 | 1.12 | 0.99 | 0.88 | 0.80 |
| 0.109 | 1071.1 | 1069.0 | 1067.5 | 1065.3 | 1063.3 | 1.26 | 1.14 | 1.01 | 0.89 | 0.81 |

---

|       |        |        |        |        |        |      |      |      |      |      |
|-------|--------|--------|--------|--------|--------|------|------|------|------|------|
| 0.129 | 1071.2 | 1069.1 | 1067.6 | 1065.4 | 1063.4 | 1.29 | 1.16 | 1.02 | 0.90 | 0.82 |
| 0.151 | 1071.3 | 1069.2 | 1067.6 | 1065.5 | 1063.4 | 1.30 | 1.17 | 1.04 | 0.92 | 0.84 |

Standard uncertainty in molality  $u(m) = 0.001 \text{ mol kg}^{-1}$ , in pressure  $u(p) = 0.01 \times 10^6 \text{ Pa}$ , in temperature  $u(T) = 0.01 \text{ K}$ , in density  $u(\rho) = 0.5 \text{ kg m}^{-3}$ , in viscosity  $u(\eta) = 0.02 \text{ mPa s}$

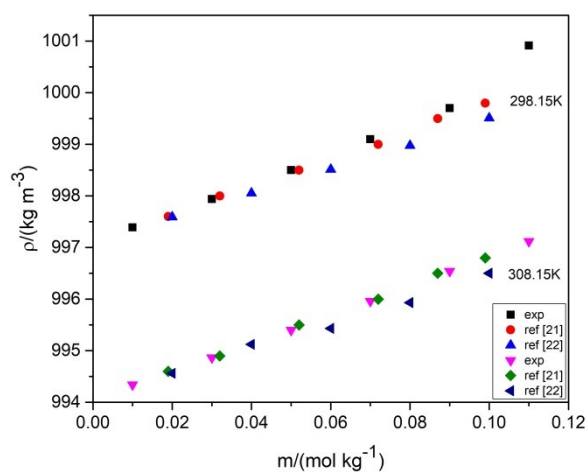

SF Fig 1. Comparison of experimental density values of aqueous NA with literature data<sup>21, 22</sup> at different temperatures.

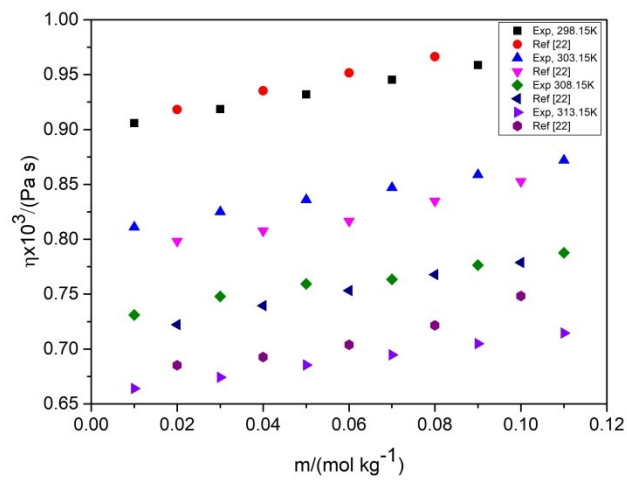

SF Fig 2. Comparison of dynamic viscosity of aqueous NA with corresponding literature values<sup>22</sup> at different temperatures.
